# Supplementary material for: Activation of aryl halides by Cu0/1,10-phenanthroline: Cu0 as precursor of CuI catalyst in cross-coupling reactions
Source: Royal Society of Chemistry journal article supplement (doi:10.1039/b814364a), 2008-01-01
Supplement: b814364a.pdf [file b814364a.pdf]

## Supplementary Information

# Activation of Aryl Halides by Cu<sup>0</sup>/1,10-phenanthroline: Cu<sup>0</sup> as Precursor of Cu<sup>I</sup> Catalyst in Cross-Coupling Reactions

Mounir Mansour,<sup>a</sup> Roberto Giacomazzi,<sup>a</sup> Armelle Ouali,<sup>b</sup> Marc Taillefer<sup>b</sup> and Anny Jutand<sup>\*a</sup>

5

<sup>a</sup> Ecole Normale Supérieure (ENS), Département de Chimie, UMR CNRS 8640, 24 Rue Lhomond F-75231 Paris Cedex 05, France. Fax: 33144322402; Tel: 33144323872; E-mail: [Anny.Jutand@ens.fr](mailto:Anny.Jutand@ens.fr)

<sup>b</sup> Institut Charles Gerhardt Montpellier, AM<sub>2</sub>N, ENSCM, 8 rue de l'Ecole Normale, F-34296 Montpellier Cedex 5, France.

10

## Reaction of 1,10-phenanthroline with CuI in acetonitrile.

The cyclic voltammetry of CuI (2 mM) was performed in CH<sub>3</sub>CN (containing *n*Bu<sub>4</sub>NBF<sub>4</sub>, 0.3 M). It exhibited an irreversible reduction peak ( $E^p = -0.637$  V vs SCE) and two irreversible oxidation peaks ( $E^p = +0.506$  V and  $+0.854$  V). The first oxidation peak was assigned to the oxidation of I<sup>-</sup> by comparison to an authentic sample of *n*Bu<sub>4</sub>NI. Conductivity measurements performed in acetonitrile revealed that CuI was fully dissociated into ionic Cu(CH<sub>3</sub>CN)<sub>4</sub><sup>+</sup> and I<sup>-</sup> (conductivity:  $\kappa = 110$   $\mu$ S cm<sup>-1</sup> for CuI (2 mM), Tacussel CDM210 conductivity meter, cell constant = 1 cm<sup>-1</sup>). Consequently, in acetonitrile CuI behaved as the cationic Cu(CH<sub>3</sub>CN)<sub>4</sub><sup>+</sup> and its reaction with phenanthroline was similar to that performed from Cu(CH<sub>3</sub>CN)<sub>4</sub><sup>+</sup>PF<sub>6</sub><sup>-</sup> in acetonitrile. Indeed, the cyclic voltammogram exhibited three reduction peaks ( $E^{p_{R0}} = -1.60$  V,  $E^{p_{R1}} = -1.78$  V,  $E^{p_{R3}} = -1.96$  V) very similar to those observed when starting from Cu(CH<sub>3</sub>CN)<sub>4</sub><sup>+</sup>PF<sub>6</sub><sup>-</sup> (see text, Fig. 1b).

30

**Mechanism of the activation of ArX by Cu<sup>0</sup>/phenanthroline by electron transfer.** A more sophisticated study should be done to discriminate two mechanisms proceeding by electron transfer (L = phenanthroline):

35

Outer-sphere mechanism :

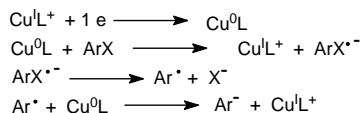

40

Inner-sphere mechanism :

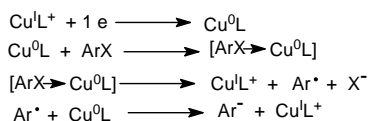

Such study is beyond the purpose of this work. We are nevertheless inclined to favour an inner-sphere mechanism for the reaction of Cu<sup>0</sup>(phen) with ArX since the catalytic effect was less important in the presence of 2 equiv of phenanthroline. Cu<sup>0</sup>(phen) and Cu<sup>0</sup>(phen)<sub>2</sub> were generated at the same potential (R<sub>1</sub>). Since Cu<sup>0</sup>(phen)<sub>2</sub> was less efficient, this suggests that the

50

saturated complex Cu<sup>0</sup>(phen)<sub>2</sub> (19-electron instead of 15-electron for Cu<sup>0</sup>(phen)) could not coordinate to PhI as required in an inner-sphere mechanism. Cu<sup>0</sup>(phen)<sub>2</sub> probably reacted via an outer-sphere process which is always slower than an inner-sphere one. The inner-sphere mechanism from Cu<sup>0</sup>(phen) is also supported by the fact that 4-NC-C<sub>6</sub>H<sub>4</sub>-Cl was more easily reduced than 4-CH<sub>3</sub>O-C<sub>6</sub>H<sub>4</sub>-Br (Table 1) but no NC-C<sub>6</sub>H<sub>5</sub> was formed in the electrolysis performed from 4-NC-C<sub>6</sub>H<sub>4</sub>-Cl whereas 4-CH<sub>3</sub>O-C<sub>6</sub>H<sub>5</sub> was formed from 4-CH<sub>3</sub>O-C<sub>6</sub>H<sub>4</sub>-Br (Table 1).

55

60

## Typical procedure for the analysis of the reaction of Cu(CH<sub>3</sub>CN)<sub>4</sub><sup>+</sup>PF<sub>6</sub><sup>-</sup> and 1,10-phenanthroline by cyclic voltammetry.

The cyclic voltammetry was performed in a air-tight three-electrode cell under argon at room temperature. The working electrode was a glassy carbon disk (d = 3 mm). The counter-electrode was a platinum wire. The reference was a Saturated Calomel Electrode separated from the solution by a bridge filled with 2 mL of degassed and dried acetonitrile containing *n*Bu<sub>4</sub>NBF<sub>4</sub> (0.3 M). 15 mL of degassed and dried acetonitrile containing *n*Bu<sub>4</sub>NBF<sub>4</sub> (0.3 M) were introduced into the cell followed by 11.2 mg (0.03 mmol) of Cu(CH<sub>3</sub>CN)<sub>4</sub><sup>+</sup>PF<sub>6</sub><sup>-</sup>. Cyclic voltammetry was performed at the scan rate of 0.5 Vs<sup>-1</sup>. 5.4 mg (0.03 mmol) of 1,10-phenanthroline were then introduced and the CV performed under the same conditions. When the CV was performed at higher scan rates (from 20 up to 1000 Vs<sup>-1</sup>), the size of the electrode was changed (d = 1 mm) to minimize the ohmic drop. Similar experiments were performed in the presence of 11 mg (0.06 mmol) of 1,10-phenanthroline.

65

70

75

80

## Typical procedure for Cu<sup>0</sup>-catalyzed electrosyntheses of ArH from ArX (Table 1).

Electrosyntheses were performed in a two-compartment air-tight three-electrode cell under argon at room temperature. The two compartments were separated by a sintered glass disk. The cathode was a carbon woven (ca. 4 cm<sup>2</sup> surface area). The anode was a sacrificial zinc rod (oxidation to Zn<sup>2+</sup>). The reference was a Saturated Calomel Electrode separated from the solution by a bridge filled with 2 mL of degassed and dried acetonitrile containing *n*Bu<sub>4</sub>NBF<sub>4</sub> (0.3 M). The cathodic and anodic compartments were charged with 12 mL and 2 mL of degassed and dried acetonitrile containing *n*Bu<sub>4</sub>NBF<sub>4</sub> (0.3 M) respectively. 18.6 mg (0.05 mmol) of Cu(CH<sub>3</sub>CN)<sub>4</sub><sup>+</sup>PF<sub>6</sub><sup>-</sup>, 9 mg (0.05 mmol) of phenanthroline and 117 mg (0.5 mmol) of 4-MeO-C<sub>6</sub>H<sub>4</sub>-I were added to the

85

90

95

cathodic compartment. The electrolysis was carried out at a controlled potential of  $-1.5$  V, using a Tacussel PJT 35-2 potentiostat. The electrolysis was stopped when the current dropped to background level, after 90 min. A charge of 106 C had been passed through the cell. The cathodic compartment was hydrolyzed with 1 mL of aqueous HCl (10 %). After extraction with diethyl ether, the organic phase was dried on  $\text{MgSO}_4$  and evaporated. The yield of Ph-OMe (76 %) was determined on the crude mixture by  $^1\text{H}$  NMR (250 MHz) using  $\text{CHCl}_2\text{CHCl}_2$  (0.2 mmol) as an internal standard. Characterization of Ph-OMe:  $^1\text{H}$  NMR (250 MHz,  $\text{CDCl}_3$ )  $\delta = 3.73$  (s, 3H,  $\text{CH}_3$ ), 6.83 (d, 2H,  $J = 7.7$  Hz,  $o\text{-H}$ ), 6.87 (t, 1H,  $J = 7.7$  Hz,  $p\text{-H}$ ); 7.21 (t, 2H,  $J = 7.7$  Hz,  $m\text{-H}$ ); similar to the spectrum of a commercial authentic sample. The  $^1\text{H}$  NMR spectra of the arenes (PhCN, PhCH<sub>3</sub>) synthesized in Table 1 were identical to those of commercial samples.

### Characterization of phenanthroline by cyclic voltammetry

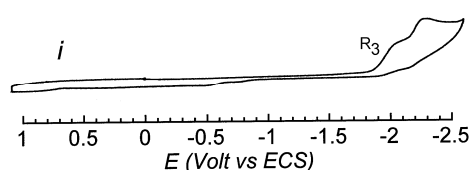

**Fig. S11** Cyclic voltammetry of 1,10-phenanthroline (4 mM) performed in acetonitrile containing  $n\text{Bu}_4\text{NBF}_4$  (0.3 M) at a steady glassy carbon disk electrode ( $d = 3$  mm) at the scan rate of  $0.5 \text{ V s}^{-1}$ , at  $20^\circ\text{C}$ . First reduction peak potential:  $E_{R3}^0 = -2.03 \text{ V vs SCE}$ .

### Activation of PhI by electrogenerated $\text{Cu}^0(\text{phenanthroline})$ as evidenced by cyclic voltammetry.

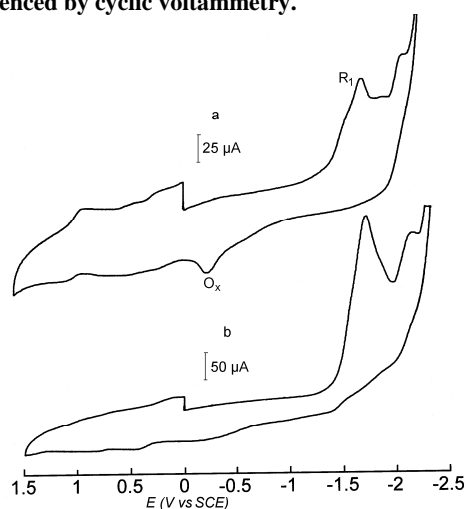

**Fig. S12** a) Cyclic voltammetry of  $\text{Cu}(\text{CH}_3\text{CN})_4^+\text{PF}_6^-$  (2 mM) in the presence of 1,10-phenanthroline (2 mM), in acetonitrile containing  $n\text{Bu}_4\text{NBF}_4$  (0.3 M) at a steady glassy carbon disk electrode ( $d = 3$  mm) at the scan rate of  $0.5 \text{ V s}^{-1}$ , at  $20^\circ\text{C}$ . b) After addition of PhI (2 mM). The current scale has been divided by 2 when going from a) to b).

### Characterisation of 4-NC-C<sub>6</sub>H<sub>4</sub>-CuBr(phenanthroline)<sup>+</sup>I<sup>-</sup>.

The ESI MS of the isolated complex 4-NC-C<sub>6</sub>H<sub>4</sub>-Cu<sup>III</sup>-Br(phenanthroline)<sup>+</sup>I<sup>-</sup> generated by oxidative addition of 4-NC-C<sub>6</sub>H<sub>4</sub>-I to  $\text{CuBr}(\text{PPh}_3)(\text{phen})^{\text{I}}$  in toluene at reflux exhibited an isotopic pattern centred at 426 in agreement with the formula  $\text{C}_{19}\text{H}_{12}\text{BrCuN}_3$ . The  $^1\text{H}$  NMR (250 MHz,  $\text{CD}_2\text{Cl}_2$ , TMS) exhibited two broad signals of same amplitude at 6.88 and 6.60 ppm assigned to the aromatic protons of 4-NC-C<sub>6</sub>H<sub>4</sub> ligated to the  $\text{Cu}^{\text{III}}$  center.

### References

- 1 For the use of  $\text{CuBr}(\text{PPh}_3)(\text{phen})$  as catalyst in cross-coupling reactions see: R. K. Gujadhur, C. G. Bates, D. Venkataraman, *Org. Lett.*, **2001**, 3, 4315.
